# Supplementary material for: Annexin A1 is a polarity cue that directs mitotic spindle orientation during mammalian epithelial morphogenesis
Source: PubMed Central journal article supplement (PMC9834401; doi:10.1038/s41467-023-35881-x), 2023-01-11
Supplement: 41467_2023_35881_MOESM1_ESM.pdf [file 41467_2023_35881_MOESM1_ESM.pdf]

# Supplementary information

## **Annexin A1 is a polarity cue that directs mitotic spindle orientation during mammalian epithelial morphogenesis**

Maria Fankhaenel<sup>1,2</sup>, Farahnaz S. Golestan Hashemi<sup>1,2</sup>, Larissa Mourao<sup>3</sup>, Emily Lucas<sup>1,2</sup>, Manal M.

Hosawi<sup>1,2</sup>, Paul Skipp<sup>1,2,4</sup>, Xavier Morin<sup>5</sup>, Colinda L.G.J. Scheele<sup>3</sup> & Salah Elias<sup>1,2</sup>

**Supplementary Fig. 1** Experimental design for determining the LGN interactome in mammary epithelial cells. (page 2)

**Supplementary Fig. 2** ANXA1 co-distributes with S100A11, LGN, NuMA, and microtubules. (page 4)

**Supplementary Fig. 3** ANXA1 acts upstream of LGN to ensure proper mitotic spindle orientation. (page 6)

**Supplementary Fig. 4** Characterisation of ANXA1 expression and oriented cell divisions in human mammary epithelial cells *in situ* and 3D culture. (page 8)

**Fiji custom macro for quantification of cortical protein fluorescence intensities during prometaphase.** (page 10)

**Representative examples of the gating strategy used to purify stable MCF-10A expressing GFP-LGN, EB3-GFP or ANXA1-mCherry** (page 12)

# Supplementary Fig. 1

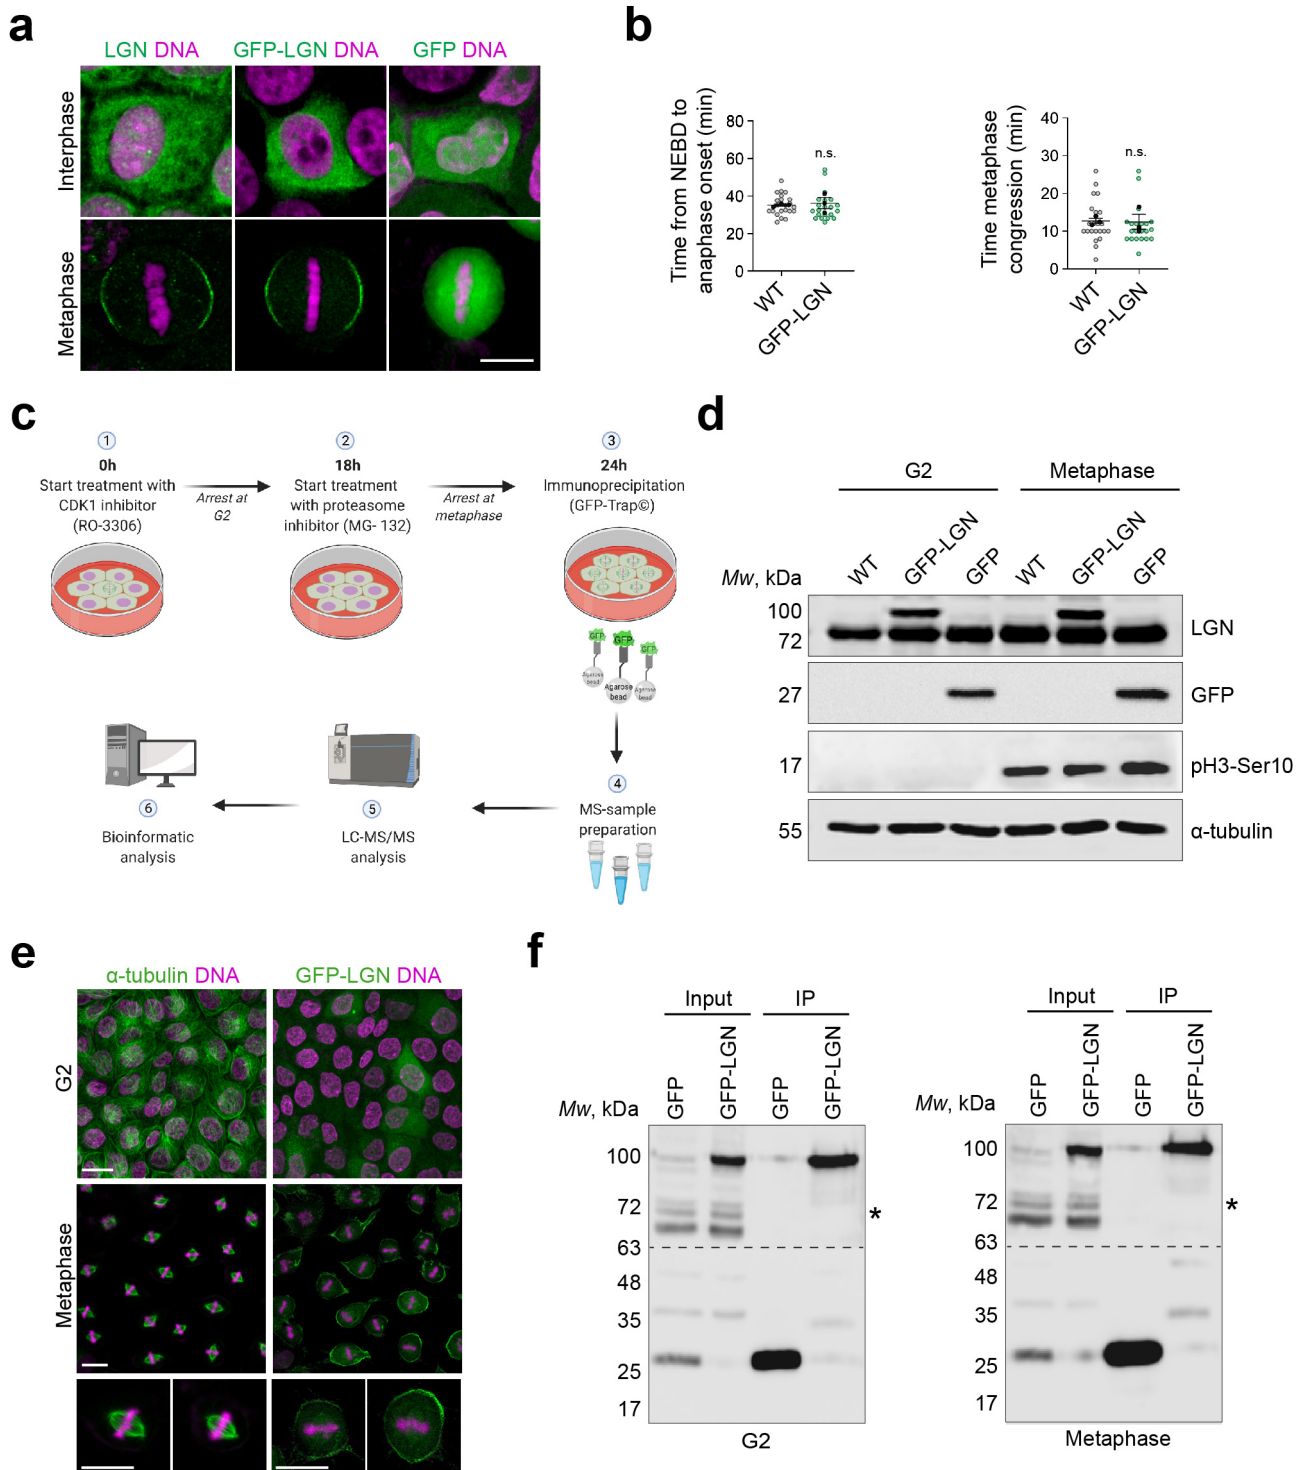

**Supplementary Fig. 1 Experimental design for determining the LGN interactome in mammary epithelial cells. (a)** Confocal images of representative wild type (WT) MCF-10A and the generated clonal MCF-10A stably expressing GFP-LGN or GFP in interphase and metaphase. Cells are stained for LGN or GFP (green) and counterstained with DAPI (DNA, magenta). **(b)** Time from NEBD to

anaphase (left) and duration of metaphase congression (right), determined from time-lapse microscopy in WT MCF-10A cells and clonal MCF-10A stably expressing GFP-LGN (3 independent experiments, WT:  $n = 23$ ; GFP-LGN:  $n = 21$ ). **(c)** Illustration showing the proteomic workflow from the synchronisation procedure to the experimental pipeline leading to LC-MS/MS and bioinformatic-based identification of the LGN interactome. Cells were treated with the CDK1 inhibitor RO-3306, yielding cells synchronised in G2 phase, then arrested in metaphase by treatment with the proteasome inhibitor MG-132. The drugs used for synchronisation were washed out prior to extract preparation for affinity purification with GFP-Trap beads. **(d)** Western blotting of extracts from WT MCF-10A and clonal MCF-10A stably expressing GFP-LGN or GFP cells synchronised in G2 phase or metaphase (3 independent experiments). **(e)** Confocal images of representative clonal MCF-10A stably expressing GFP-LGN cells synchronised in G2 phase or metaphase. Cells are stained for  $\alpha$ -tubulin or GFP (green) and counterstained with DAPI (DNA, magenta) (3 independent experiments). **(f)** Western blotting of extracts of GFP- and GFP-LGN-bead-bound elutions from cells synchronised in G2 phase (left) or metaphase (right) (3 independent experiments). Asterisks indicate endogenous LGN in the input samples. All data are presented as mean  $\pm$  s.e.m. n.s. (not significant). All scale bars, 10  $\mu$ m. Source data are provided as a Source Data file.

## Supplementary Fig. 2

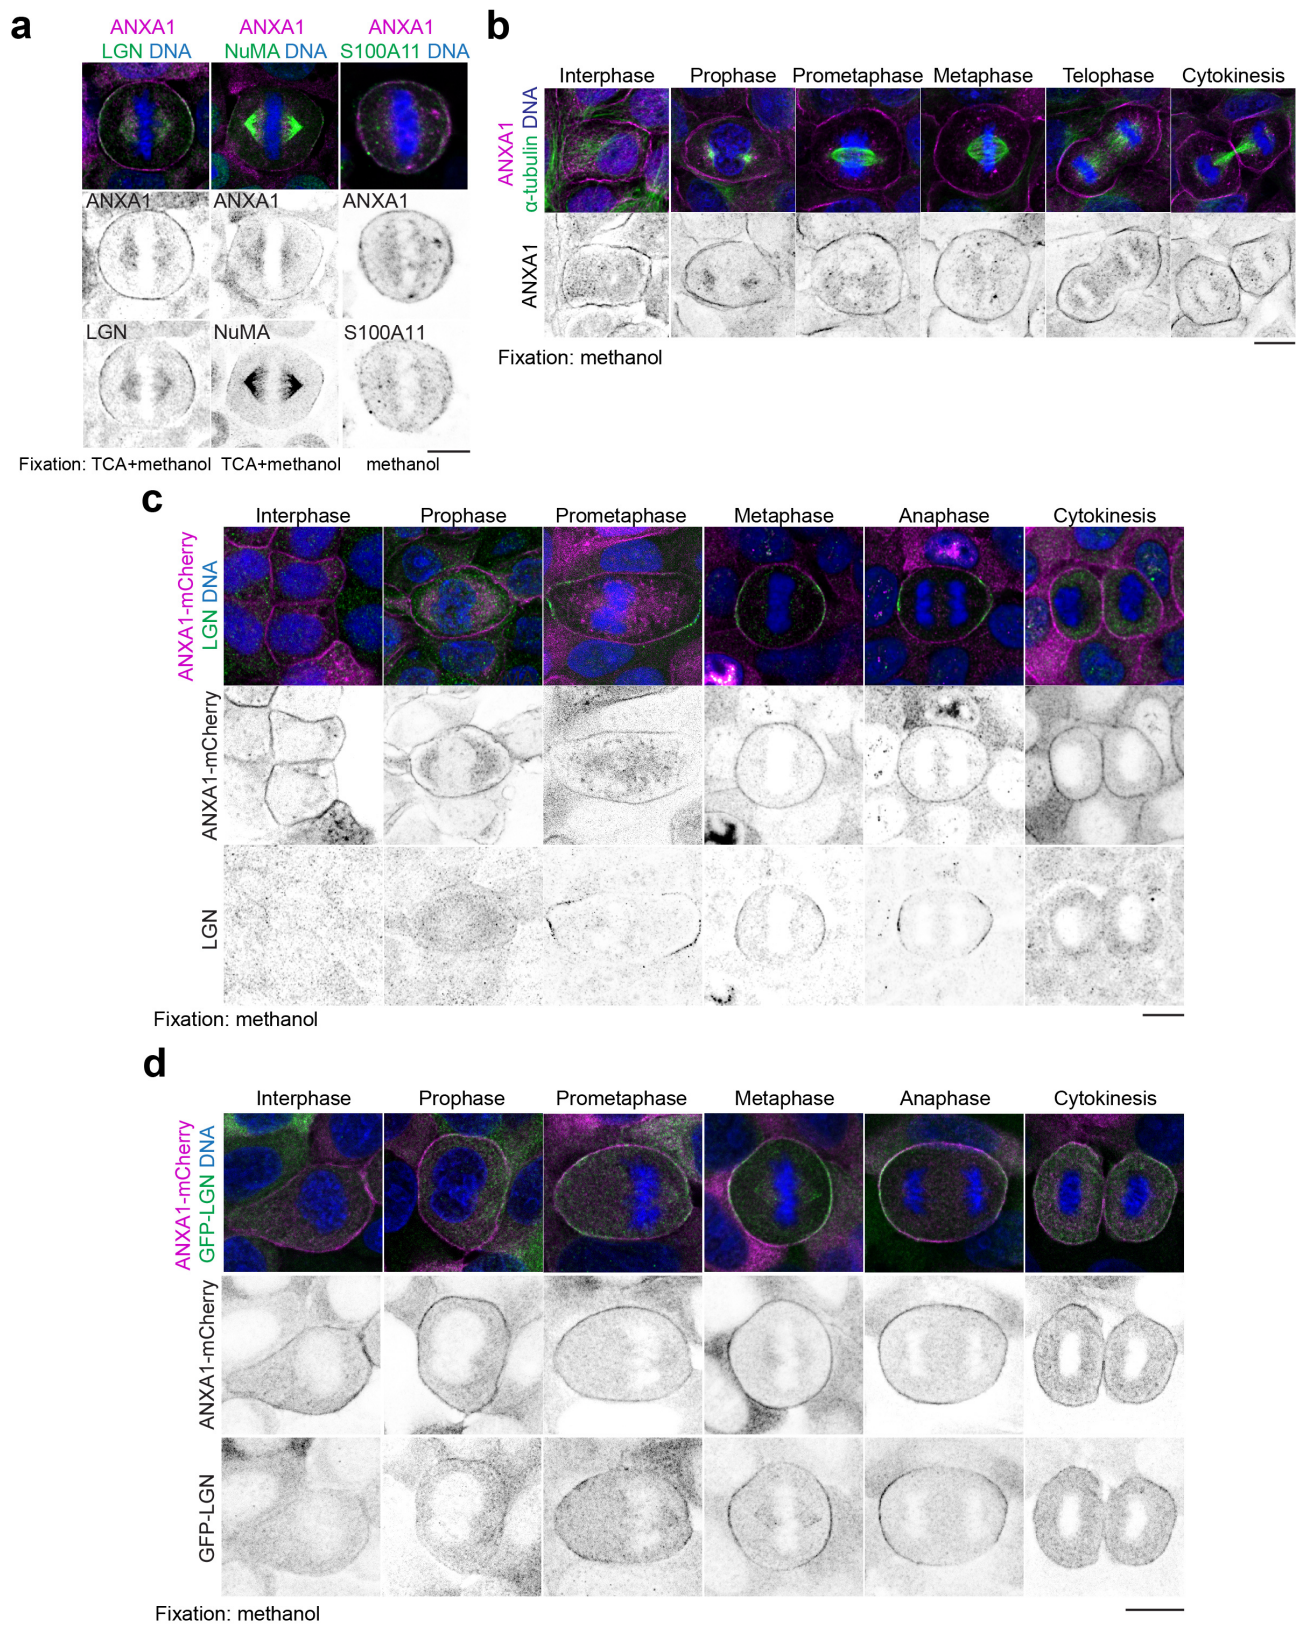

**Supplementary Fig. 2 ANXA1 co-distributes with S100A11, LGN, NuMA, and microtubules. (a)** Confocal images of representative MCF-10A cells stained for ANXA1 (magenta) and LGN, NuMA or



S100A11 (green), and counterstained with DAPI (DNA, blue). **(b)** Confocal images of representative MCF-10A stained for ANXA1 (magenta) and  $\alpha$ -tubulin (green), and counterstained with DAPI (DNA, blue). **(c)** Confocal images of representative clonal MCF-10A cells stably expressing ANXA1-mCherry (magenta) stained for LGN (green) and counterstained with DAPI (DNA, blue). **(d)** Confocal images of representative clonal MCF-10A cells stably expressing ANXA1-mCherry (magenta) and GFP-LGN (green) and counterstained with DAPI (DNA, blue). All data are from 3 independent experiments. TCA (Trichloroacetic acid). All scale bar, 10  $\mu$ m.

### Supplementary Fig. 3

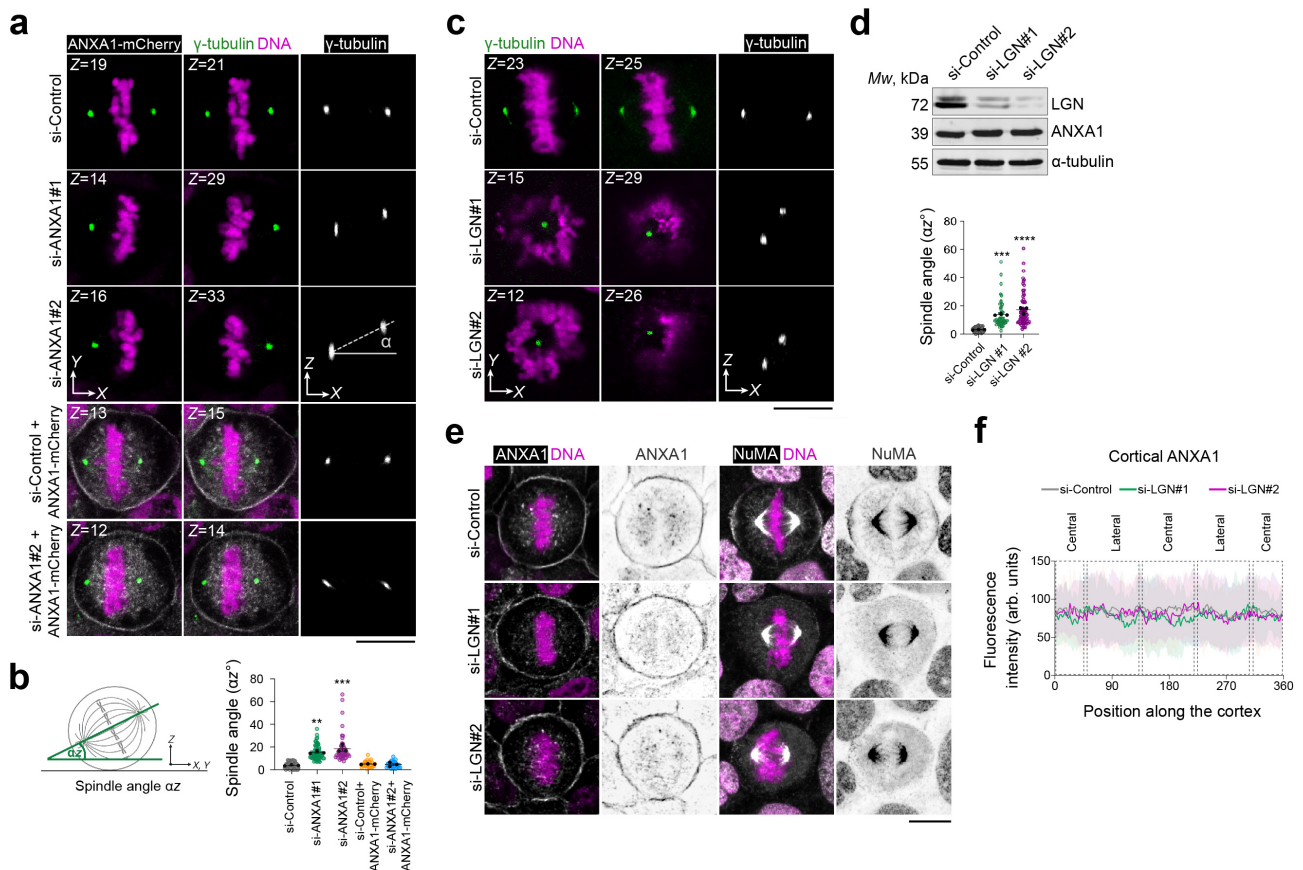

**Supplementary Fig. 3 ANXA1 acts upstream of LGN to ensure proper mitotic spindle orientation.** (a) Confocal images of representative MCF-10A cells transfected with si-Control, si-ANXA1#1 or si-ANXA1#2, expressing or not ANXA1-mCherry and stained for  $\gamma$ -tubulin (green), and counterstained with DAPI (DNA, magenta). Z projections in the XY view and XZ view are shown. Scale bars, 5  $\mu$ m. (b) Mitotic spindle angles in siRNA-transfected cells expressing or not ANXA1-mCherry (si-Control:  $n = 71$ ; si-ANXA1#1:  $n = 65$ ; si-ANXA1#2:  $n = 49$ ; si-Control + ANXA1-mCherry:  $n = 30$ ; si-ANXA1#2 + ANXA1-mCherry:  $n = 30$ ). One-way ANOVA with Tukey's test, \*\*  $P = 0.002$ ; \*\*\*  $P = 0.001$ . (c) Confocal images of representative MCF-10A cells transfected with si-Control, si-LGN#1 or si-LGN#2 stained for  $\gamma$ -tubulin (green) and counterstained with DAPI (DNA, magenta). Z projections in the XY view and XZ view are shown. Scale bars, 5  $\mu$ m. (d) Top: Western blotting of extracts from MCF-10A transfected with si-Control, si-LGN#1 or si-LGN#2. Bottom: Mitotic spindle angles in siRNA-transfected cells (si-Control:  $n = 68$ ; si-LGN#1:  $n = 50$ ; si-LGN#2:  $n = 67$ ). One-way ANOVA with Tukey's test, \*\*\*  $P = 0.0006$ ; \*\*\*\*  $P = 0.0001$ . (e) Confocal images of representative MCF-10A cells stained for ANXA1 or NuMA (grey) and counterstained with DAPI (DNA, magenta).

Scale bars, 10  $\mu\text{m}$ . **(f)** Average cortical fluorescence intensity profiles of ANXA1 from metaphase siRNA-transfected cells (si-Control  $n = 41$ ; si-LGN#1  $n = 26$ ; si-LGN#2  $n = 25$ ). All data are presented as mean  $\pm$  s.e.m. from 3 independent experiments. arb. units (arbitrary units). Source data are provided as a Source Data file.

# Supplementary Fig. 4

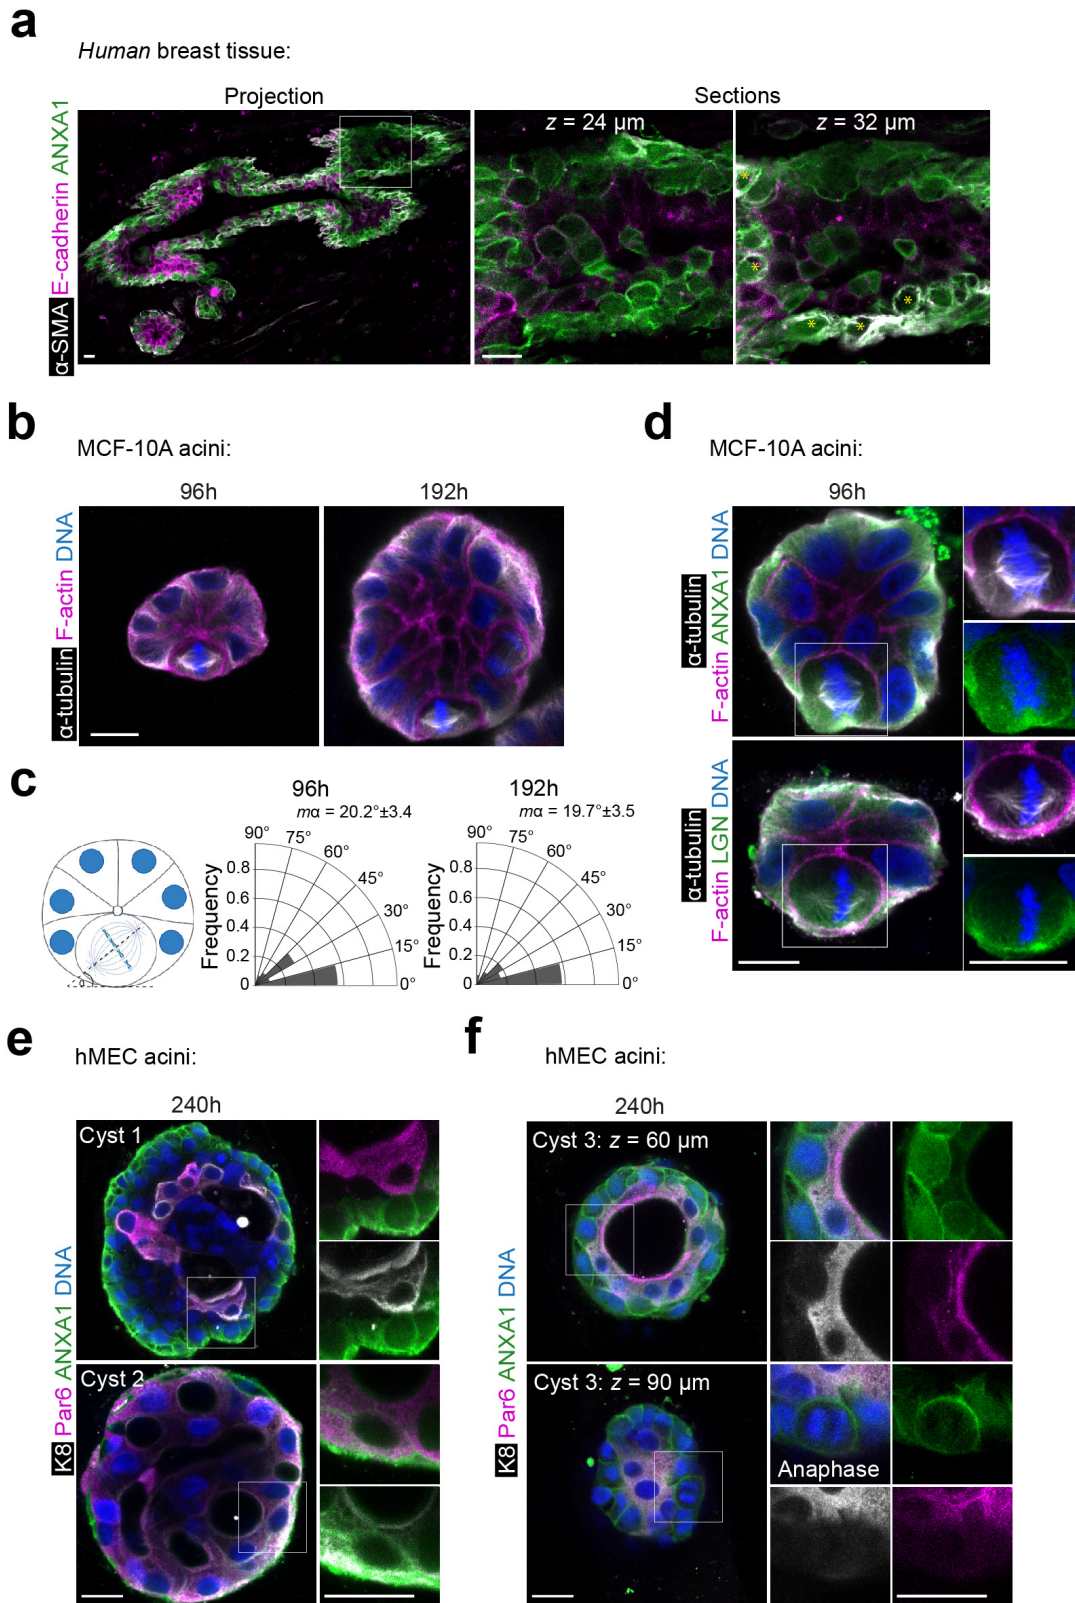

Supplementary Fig. 4 Characterisation of ANXA1 expression and localisation and OCDs in human mammary epithelial cells *in situ* and 3D culture. (a) Confocal images of representative



human healthy breast cryosections (50  $\mu\text{m}$ -thick) stained for ANXA1 (green),  $\alpha$ -SMA (grey) and E-cadherin (magenta). **(b)** Confocal images of representative MCF-10A acini stained for F-actin (magenta) and  $\alpha$ -tubulin (grey) and counterstained with DAPI (DNA, blue). **(c)** Spindle angle frequencies and mean angles ( $m\alpha$ ) (3 independent experiments, 96h: n = 30 acini; 192h: n = 30 acini). **(d)** Confocal images of representative MCF-10A acini stained for F-actin (magenta),  $\alpha$ -tubulin (grey) and LGN or ANXA1 (green), and counterstained with DAPI (DNA, blue) (3 independent experiments). **(e)** Confocal images of representative hMEC acini forming multiple small lumens, stained for Par6 (magenta), K8 (grey) and ANXA1 (green), and counterstained with DAPI (DNA, blue) (2 independent experiments). **(f)** Confocal images of representative hMEC acini forming a single central lumen, stained for Par6 (magenta), K8 (grey) and ANXA1 (green), and counterstained with DAPI (DNA, blue) (2 independent experiments). Data are presented as mean  $\pm$  s.e.m. All scale bars, 10  $\mu\text{m}$ . Source data are provided as a Source Data file.

## Fiji custom macro for quantification of cortical protein fluorescence intensities during prometaphase

```
macro elliptic_slicing {

//number of points to measure along the cell perimeter
k=180;
//length (in pixels) of the line for each measure:
px=15;
//starting position of the scan line relative to the ellipses long axis
S=90;

titre=getTitle();
getDimensions(x,y,nb_channel,o,t);
run("Set Measurements...", "area mean standard min bounding fit redirect=None decimal=3");
b=57.29578;
m=nResults;
IJ.deleteRows(0, m-1);
getPixelSize(unit, pw, ph, pd);
P=pd/pw;
run("Properties...", "unit=pixel pixel_width=1.0000 pixel_height=1.0000 voxel_depth="+P+"
origin=0,0");

        selectWindow(titre);
        run("Set... ", "zoom=150");
        setTool("Freehand");

//message prompting the user to set the ellipse:
        title = "cell center";
        msg = "use the Freehand tool to draw\n the cell's perimeter\n select the best z-
level\n then click \"OK\".";
        waitForUser(title, msg);

//measuring the ellipses center and size:
        run("Fit Ellipse");
        run ("Measure");
        x0=getResult("BX", (0));
        x1=getResult("Width", (0));
                M=getResult("Major", (0));
                m=getResult("Minor", (0));
                a=getResult("Angle", (0));
                E=sqrt(M*M-m*m)/M;
        y0=getResult("BY", (0));
        y1=getResult("Height", (0));
//center of the ellipse:
        X0=x0+x1/2;
        Y0=y0+y1/2;

xx=newArray(k);
yy=newArray(k);

        for (i=0; i<k; i++) {
                xx[i]=i;
                l=(360*i/k-a+S)/b;
                L=(360*i/k+S)/b;
                dia=sqrt(m*m/(1-E*E*cos(L)*cos(L)))/2;
        }
}
```

```
        n1=dia-px/2;
        n2=dia+px/2;
selectWindow(titre);
makeLine(X0+n1*cos(l), Y0+n1*sin(l), X0+n2*cos(l), Y0+n2*sin(l));
        run ("Measure");
        yy[i]=getResult("Max", (0));
        IJ.deleteRows(0, 0);
    print(yy[i]);
};
Plot.create("plot1", "X", "Y", xx, yy);
}
```

# Representative examples of the gating strategies used to purify stable MCF-10A expressing GFP-LGN, EB3-GFP or ANXA1-mCherry

## 1. Purification of MCF-10A cells expressing GFP-LGN or EB3-GFP

Negative Control: Wild-type/non-transfected MCF-10A cells

Cell gating & exclusion of debris → Gating of GFP+ cells

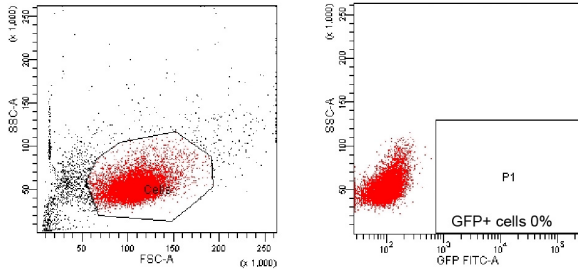

| Tube: Non-transfected |         |         |        |
|-----------------------|---------|---------|--------|
| Population            | #Events | %Parent | %Total |
| All Events            | 10,000  | ####    | 100.0  |
| Cells                 | 8,550   | 85.5    | 85.5   |
| P1                    | 0       | 0.0     | 0.0    |

Positive Control: MCF-10A cells expressing pTK14-GFP

Cell gating & exclusion of debris → Gating of GFP+ cells

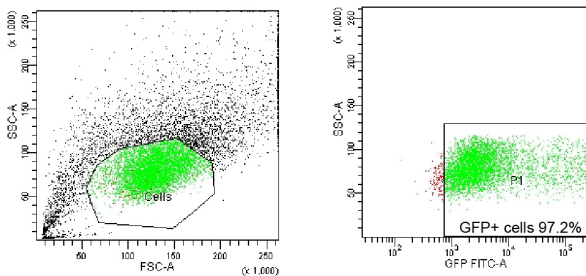

| Tube: pTK14-GFP |         |         |        |
|-----------------|---------|---------|--------|
| Population      | #Events | %Parent | %Total |
| All Events      | 10,000  | ####    | 100.0  |
| Cells           | 5,939   | 59.4    | 59.4   |
| P1              | 5,774   | 97.2    | 57.7   |

MCF-10A expressing pTK14-GFP-LGN

Cell gating & exclusion of debris → Gating of GFP+ cells

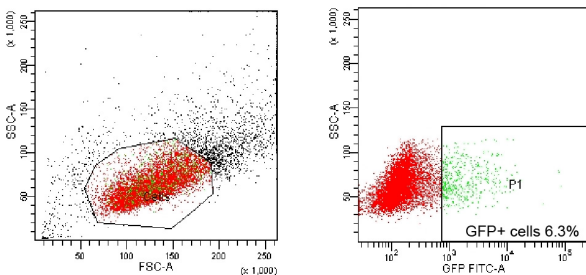

| Tube: pTK14-GFP-LGN |         |         |        |
|---------------------|---------|---------|--------|
| Population          | #Events | %Parent | %Total |
| All Events          | 10,000  | ####    | 100.0  |
| Cells               | 7,895   | 79.0    | 79.0   |
| P1                  | 495     | 6.3     | 5.0    |

MCF-10A expressing pTK14-EB3-GFP

Cell gating & exclusion of debris → Gating of GFP+ cells

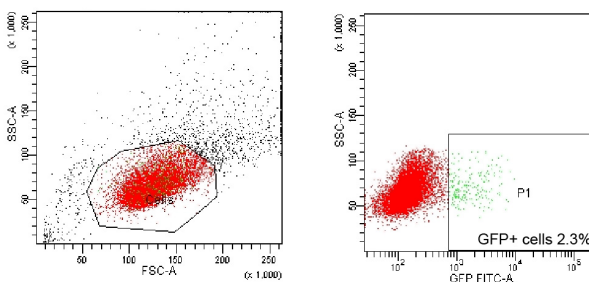

| Tube: pTK14-EB3-GFP |         |         |        |
|---------------------|---------|---------|--------|
| Population          | #Events | %Parent | %Total |
| All Events          | 10,000  | ####    | 100.0  |
| Cells               | 8,715   | 87.2    | 87.2   |
| P1                  | 201     | 2.3     | 2.0    |



## 2. Purification of MCF-10A expressing ANXA1-mCherry

Negative Control: Wild-type/non-transfected MCF-10A cells

Cell gating & exclusion of debris → Gating of mCherry+ cells

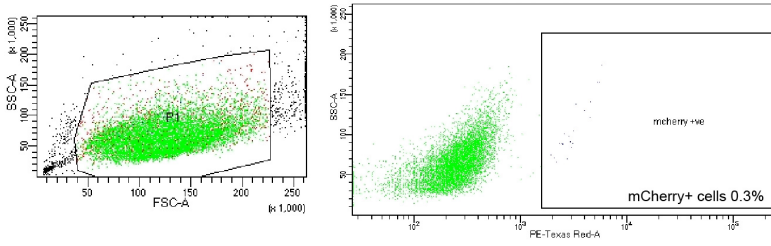

| Tube: Non-transfected |         |         |        |
|-----------------------|---------|---------|--------|
| Population            | #Events | %Parent | %Total |
| All Events            | 10,000  | ####    | 100.0  |
| P1                    | 9,187   | 91.9    | 91.9   |
| P2                    | 7,915   | 86.2    | 79.1   |
| mcherry +ve           | 20      | 0.3     | 0.2    |

Positive Control: MCF-10A cells expressing mCherry

Cell gating & exclusion of debris → Gating of mCherry+ cells

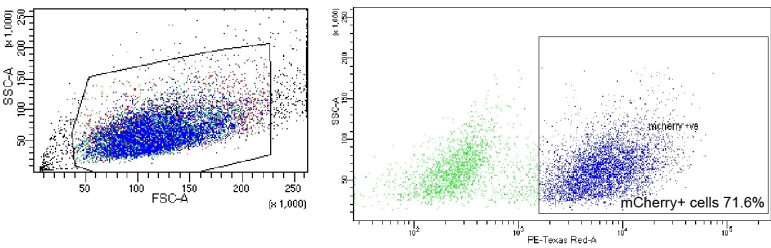

| Tube: pTK93-mCherry |         |         |        |
|---------------------|---------|---------|--------|
| Population          | #Events | %Parent | %Total |
| All Events          | 10,000  | ####    | 100.0  |
| P1                  | 9,307   | 93.1    | 93.1   |
| P2                  | 7,718   | 82.9    | 77.2   |
| mcherry +ve         | 5,527   | 71.6    | 55.3   |

MCF-10A cells expressing ANXA1-mCherry

Cell gating & exclusion of debris → Gating of mCherry+ cells

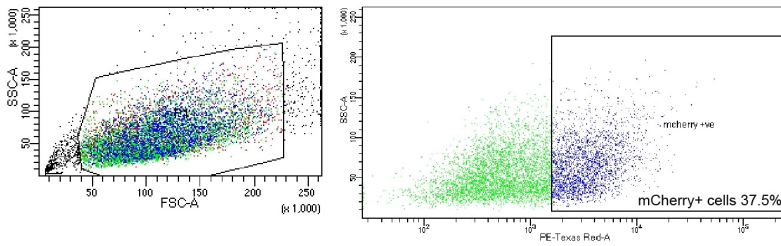

| Tube: pTK93-ANXA1-mCherry |         |         |        |
|---------------------------|---------|---------|--------|
| Population                | #Events | %Parent | %Total |
| All Events                | 10,000  | ####    | 100.0  |
| P1                        | 9,084   | 90.8    | 90.8   |
| P2                        | 7,369   | 81.1    | 73.7   |
| mcherry +ve               | 2,761   | 37.5    | 27.6   |
